# Supplementary material
Source: MDPI journal article supplement (https://www.mdpi.com/2304-6732/4/2/33)
Supplement: s1 [file s1]

Archive with 5 entries (5 files):
- 01_hexeccitation_complayersvidsmall(suppl_video_1).mp4
- 02_focus_ride_kidney(suppl_video_2).avi
- 03_Kidney_XL-SIM_3D_(suppl_video_3).avi
- XL-SIM: extending superresolution into deeper layers_supplementary_Info.pdf
- description_suppl_videos.txt
