# Supplementary material
Source: MDPI journal article supplement (https://www.mdpi.com/2304-6732/4/2/33)
Supplement: s1 [file s1 › description_suppl_videos.txt]

Desciption for Supplementary Videos:

Supplementary Video 1:
- Upper left: the movement of the hexagonally modulated excitation line in the focus plane.
- Upper right: integrated excitation intensity in the focus plane.
- lower left: the movement of the excitation line in the first non-focus Talbot-plane.
- lower right: integrated excitation intensity in the first non-focus Talbot-plane.

Supplementary Video 2:
XL-SIM focus ride through the mouse kidney slice, which is shown in figure 5 and 6c) and d).

Suppelmentary Video 3:
XL-SIM Volume from figure 5h).
